# Supplementary material
Source: publisher figshare collection journal article supplement (https://karger.figshare.com/ndownloader/files/25864569)
Supplement: Supplementary file 1 [file 25864569]

Table S1. Mineral composition of plant parts from the Diani Forest, Kenya. All values shown as % dry mass or mg/kg dry mass.

| Sample | Plant Part | Ca  (%) | P  (%) | Mg  (%) | K  (%) | Na  (%) | Fe (mg/kg) | Zn (mg/kg) | Cu (mg/kg) | Mn (mg/kg) |
| --- | --- | --- | --- | --- | --- | --- | --- | --- | --- | --- |
| *Adansonia digitata* | FL | 0.863 | 0.261 | 0.262 | 1.674 | 0.018 | 43.1 | 23.5 | 10.5 | 27.2 |
| *Adansonia digitata* | ML | 4.732 | 0.226 | 0.736 | 0.839 | 0.075 | 42.6 | 23.1 | 6.3 | 64.8 |
| *Adansonia digitata* | ML | 2.498 | 0.216 | 0.620 | 1.621 | 0.025 | 72.0 | 13.4 | 5.0 | 44.2 |
| *Adansonia digitata* | YL | 2.903 | 0.161 | 0.565 | 1.145 | 0.147 | 172.6 | 17.6 | 4.0 | 71.2 |
| *Adenanthera pavonnina* | ML | 0.889 | 0.184 | 0.319 | 1.354 | 0.007 | 85.8 | 12.5 | 13.7 | 37.0 |
| *Adenanthera pavonnina* | UFR | 0.347 | 0.283 | 0.231 | 3.419 | 0.009 | 47.7 | 45.5 | 4.5 | 17.0 |
| *Adenanthera pavonnina* | YL | 0.347 | 0.408 | 0.294 | 2.491 | 0.014 | 87.5 | 43.7 | 10.3 | 32.9 |
| *Adenia gummifera* | UFR | 0.275 | 0.221 | 0.245 | 1.639 | 0.011 | 41.1 | 31.5 | 13.0 | 29.2 |
| *Antiaris toxicaria* | YL | 0.731 | 0.342 | 0.583 | 2.417 | 0.117 | 78.4 | 49.3 | 11.3 | 23.8 |
| *Azadirachtar indica* | ML | 2.255 | 0.109 | 0.364 | 1.561 | 0.067 | 90.7 | 14.7 | 5.6 | 22.1 |
| *Balanites maughami* | ML | 1.686 | 0.079 | 0.462 | 3.537 | 0.992 | 51.9 | 9.4 | 0.7 | 28.5 |
| *Balanites maughami* | YL | 0.299 | 0.246 | 0.188 | 2.735 | 0.224 | 119.7 | 46.2 | 14.8 | 20.9 |
| *Bichermia discolour* | ML | 1.345 | 0.104 | 0.390 | 1.476 | 0.772 | 88.8 | 9.5 | 5.7 | 19.2 |
| *Bichermia discolour* | YL | 0.837 | 0.139 | 0.198 | 1.386 | 0.014 | 44.8 | 15.1 | 5.3 | 18.7 |
| *Bougainvillea spectabilis* | FL | 0.429 | 0.242 | 0.337 | 3.055 | 0.085 | 74.9 | 19.9 | 4.7 | 25.9 |
| *Bougainvillea spectabilis* | ML | 3.414 | 0.133 | 0.482 | 3.589 | 0.047 | 49.9 | 11.6 | 3.3 | 127.7 |
| *Bougainvillea spectabilis* | ML | 2.344 | 0.108 | 0.532 | 2.802 | 0.096 | 67.8 | 13.3 | 1.9 | 155.4 |
| *Bougainvillea spectabilis* | YL | 1.957 | 0.263 | 0.331 | 3.800 | 0.046 | 59.1 | 19.8 | 9.4 | 68.8 |
| *Bougainvillea spectabilis* | YL | 2.026 | 0.166 | 0.517 | 2.941 | 0.049 | 48.9 | 16.3 | 2.3 | 113.0 |
| *Bourreria petiolaris* | ML | 2.622 | 0.148 | 0.640 | 1.068 | 0.827 | 47.7 | 19.5 | 4.2 | 23.1 |
| *Bourreria petiolaris* | YL | 1.779 | 0.172 | 0.526 | 1.718 | 0.607 | 63.9 | 17.2 | 10.6 | 15.3 |
| *Carpodiptera africana* | ML | 0.897 | 0.423 | 0.622 | 2.917 | 0.127 | 96.0 | 50.6 | 9.1 | 68.1 |
| *Cassia abbreviata* | ML | 2.003 | 0.258 | 0.242 | 1.365 | 0.027 | 103.1 | 30.2 | 7.6 | 50.7 |
| *Cassia abbreviata* | YL | 1.472 | 0.085 | 0.338 | 0.822 | 0.524 | 176.4 | 13.6 | 6.0 | 43.4 |
| *Cassia fistula* | ML | 3.103 | 0.137 | 0.233 | 0.962 | 0.007 | 45.1 | 39.7 | 11.6 | 125.4 |
| *Cissus integrifolia* | ML | 2.946 | 0.116 | 0.565 | 0.622 | 0.121 | 104.8 | 10.3 | 5.1 | 39.4 |
| *Cissus integrifolia* | UFR | 1.659 | 0.284 | 0.403 | 2.754 | 0.009 | 45.5 | 19.8 | 16.2 | 15.5 |
| *Cissus integrifolia* | YL | 0.871 | 0.333 | 0.270 | 3.768 | 0.115 | 58.5 | 49.1 | 8.4 | 38.4 |
| *Coccinia grandis* | ML | 3.180 | 0.448 | 0.532 | 2.600 | 0.124 | 73.8 | 30.5 | 5.7 | 16.5 |
| *Coccinia grandis* | UFR | 0.405 | 0.349 | 0.195 | 3.065 | 0.061 | 75.1 | 18.7 | 3.7 | 11.1 |
| *Coccinia grandis* | YL | 5.252 | 0.250 | 0.609 | 2.469 | 0.187 | 129.7 | 21.1 | 7.5 | 33.0 |
| *Combretum schumanii* | ML | 1.204 | 0.169 | 0.296 | 1.117 | 0.017 | 46.0 | 16.0 | 14.0 | 82.0 |
| *Combretum schumanii* | ML | 1.403 | 0.266 | 0.423 | 1.312 | 0.351 | 66.4 | 15.7 | 2.4 | 138.8 |
| *Combretum schumanii* | YL | 0.721 | 0.271 | 0.240 | 1.321 | 0.036 | 29.0 | 24.3 | 6.3 | 54.1 |
| *Combretum schumanii* | YL | 0.715 | 0.197 | 0.261 | 1.220 | 0.021 | 37.3 | 17.2 | 4.1 | 60.5 |
| *Commiphora zanzibarica* | ML | 2.095 | 0.120 | 0.718 | 1.572 | 0.478 | 151.3 | 10.4 | 3.4 | 38.2 |
| *Commiphora zanzibarica* | YL | 1.186 | 0.159 | 0.585 | 2.042 | 0.065 | 76.4 | 14.1 | 2.2 | 19.9 |
| *Cordia goetzi* | ML | 4.858 | 0.135 | 0.413 | 2.503 | 0.065 | 164.2 | 19.7 | 5.3 | 44.8 |
| *Cordia goetzi* | YL | 0.881 | 0.559 | 0.222 | 2.478 | 0.099 | 108.0 | 40.3 | 7.5 | 19.7 |
| *Cussonia zimmermanii* | FL | 1.031 | 0.244 | 0.349 | 2.261 | 0.267 | 57.6 | 26.6 | 9.4 | 19.5 |
| *Cussonia zimmermanii* | ML | 2.122 | 0.156 | 0.321 | 0.287 | 1.177 | 87.9 | 53.8 | 2.6 | 46.2 |
| *Cussonia zimmermanii* | YL | 1.257 | 0.149 | 0.299 | 2.236 | 0.772 | 81.4 | 25.7 | 4.6 | 71.1 |
| *Cyphostemma adenaculae* | YL | 0.864 | 0.397 | 0.373 | 2.146 | 0.020 | 55.6 | 30.3 | 3.9 | 20.3 |
| *Cyphostemma spp.* | ML | 4.363 | 0.147 | 0.585 | 2.020 | 0.125 | 92.7 | 15.6 | 5.8 | 53.8 |
| *Cyphostemma spp.* | YL | 2.940 | 0.196 | 0.310 | 1.321 | 0.300 | 275.1 | 28.9 | 6.5 | 41.3 |
| *Dalbergia vaccinifolia* | ML | 3.971 | 0.102 | 0.391 | 0.614 | 0.136 | 111.1 | 29.5 | 5.7 | 86.9 |
| *Dalbergia vaccinifolia* | YL | 1.810 | 0.131 | 0.326 | 1.990 | 0.200 | 78.5 | 27.9 | 6.2 | 60.8 |
| *Delonix regia* | FL | 0.328 | 0.170 | 0.150 | 1.449 | 0.049 | 79.7 | 24.5 | 5.0 | 13.9 |
| *Delonix regia* | ML | 1.151 | 0.150 | 0.385 | 1.073 | 0.137 | 63.6 | 19.7 | 13.6 | 65.8 |
| *Delonix regia* | ML | 0.588 | 0.216 | 0.177 | 1.230 | 0.204 | 94.9 | 34.2 | 8.2 | 32.2 |
| *Delonix regia* | UFR | 0.232 | 0.184 | 0.264 | 1.019 | 0.002 | 42.0 | 57.0 | 10.9 | 18.5 |
| *Delonix regia* | YL | 0.275 | 0.217 | 0.140 | 1.428 | 0.056 | 47.8 | 29.6 | 9.6 | 19.5 |
| *Delonix regia* | YL | 0.223 | 0.216 | 0.177 | 1.646 | 0.185 | 47.7 | 19.1 | 7.8 | 18.4 |
| *Diospyros squarrosa* | ML | 0.947 | 0.169 | 0.134 | 1.235 | 0.048 | 61.0 | 14.8 | 7.9 | 72.7 |
| *Diospyros squarrosa* | YL | 0.682 | 0.258 | 0.122 | 1.460 | 0.023 | 109.3 | 23.1 | 11.7 | 63.8 |
| *Drypetes reticulata* | YL | 0.760 | 0.266 | 0.441 | 1.560 | 0.389 | 43.9 | 20.5 | 1.7 | 35.0 |
| *Feretia apodontera* | YL | 1.356 | 0.160 | 0.592 | 2.226 | 0.344 | 107.9 | 10.2 | 6.3 | 63.0 |
| *Fernandoa magnifica* | YL | 0.615 | 0.159 | 0.208 | 0.922 | 0.047 | 33.4 | 21.6 | 5.8 | 24.8 |
| *Fernandoa magnifica* | ML | 1.089 | 0.235 | 0.266 | 1.617 | 0.033 | 57.2 | 29.0 | 11.3 | 19.0 |
| *Ficus bubu* | YL | 1.870 | 0.163 | 0.391 | 2.378 | 0.018 | 73.4 | 26.7 | 3.8 | 32.1 |
| *Ficus exasperata* | ML | 3.404 | 0.120 | 0.611 | 1.619 | 0.089 | 110.6 | 16.5 | 8.5 | 37.9 |
| *Ficus exasperata* | UFR | 1.718 | 0.294 | 0.340 | 2.373 | 0.023 | 132.1 | 35.4 | 6.7 | 23.7 |
| *Ficus exasperata* | YL | 1.993 | 0.285 | 0.565 | 1.937 | 0.048 | 86.3 | 33.7 | 3.2 | 34.4 |
| *Ficus polita* | ML | 2.239 | 0.089 | 0.394 | 2.031 | 0.626 | 109.5 | 21.9 | 8.7 | 26.5 |
| *Ficus polita* | YL | 1.342 | 0.181 | 0.356 | 1.783 | 0.104 | 86.8 | 30.2 | 15.0 | 11.3 |
| *Ficus zanzibarica* | ML | 2.712 | 0.117 | 0.434 | 1.582 | 0.176 | 66.7 | 12.6 | 2.5 | 18.0 |
| *Ficus zanzibarica* | YL | 2.086 | 0.129 | 0.346 | 1.869 | 0.292 | 81.0 | 31.8 | 5.6 | 19.6 |
| *Flacourtia indica* | ML | 2.231 | 0.115 | 0.225 | 1.266 | 0.025 | 57.3 | 22.7 | 1.8 | 71.7 |
| *Flacourtia indica* | YL | 1.749 | 0.218 | 0.321 | 3.693 | 0.233 | 198.0 | 20.8 | 3.5 | 67.0 |
| *Fleuggea virosa* | ML | 1.564 | 0.170 | 0.263 | 1.571 | 0.065 | 109.0 | 14.7 | 3.6 | 71.3 |
| *Fleuggea virosa* | UFR | 0.485 | 0.214 | 0.141 | 1.424 | 0.018 | 85.8 | 16.5 | 3.6 | 19.9 |
| *Fleuggea virosa* | YL | 1.241 | 0.208 | 0.267 | 1.507 | 0.062 | 104.0 | 14.9 | 4.3 | 59.7 |
| *Gliricidia sepium* | FL | 0.105 | 0.143 | 0.089 | 1.593 | 0.120 | 36.3 | 13.0 | 1.0 | 9.2 |
| *Grewia holstii* | ML | 2.208 | 0.124 | 0.289 | 1.261 | 0.108 | 363.9 | 24.9 | 10.9 | 84.1 |
| *Grewia holstii* | YL | 1.271 | 0.390 | 0.476 | 2.346 | 0.043 | 36.9 | 29.3 | 14.2 | 58.3 |
| *Grewia plagiophylla* | ML | 1.760 | 0.237 | 0.305 | 2.528 | 0.279 | 50.1 | 17.6 | 10.9 | 39.7 |
| *Grewia vaughanii* | YL | 1.064 | 0.182 | 0.246 | 1.441 | 0.024 | 58.7 | 13.5 | 4.8 | 38.2 |
| *Grewia vaughanii* | ML | 2.250 | 0.324 | 0.254 | 2.703 | 0.048 | 93.6 | 22.2 | 15.0 | 87.7 |
| *Haplocoelum inopleum* | ML | 0.869 | 0.181 | 0.202 | 2.143 | 0.206 | 77.3 | 26.0 | 8.7 | 25.6 |
| *Haplocoelum inopleum* | YL | 0.261 | 0.421 | 0.220 | 2.404 | 0.043 | 64.8 | 48.1 | 13.0 | 21.5 |
| *Hibiscus rosanensis* | ML | 1.679 | 0.229 | 0.771 | 0.897 | 2.196 | 122.9 | 28.6 | 4.8 | 161.6 |
| *Hibiscus rosanensis* | YL | 0.678 | 0.246 | 0.447 | 1.112 | 1.249 | 47.6 | 23.2 | 3.7 | 68.1 |
| *Hunteria zeylanica* | ML | 1.467 | 0.228 | 0.437 | 1.967 | 0.130 | 41.6 | 66.7 | 30.5 | 101.6 |
| *Hunteria zeylanica* | ML | 1.127 | 0.139 | 0.377 | 1.923 | 0.227 | 66.2 | 28.5 | 6.4 | 65.8 |
| *Hunteria zeylanica* | YL | 0.319 | 0.172 | 0.269 | 3.380 | 0.052 | 36.7 | 28.0 | 17.5 | 20.0 |
| *Hunteria zeylanica* | YL | 0.403 | 0.215 | 0.212 | 3.409 | 0.119 | 47.1 | 44.4 | 21.1 | 65.4 |
| *Jasminium merijohonnes* | ML | 2.508 | 0.256 | 0.445 | 3.040 | 0.323 | 203.2 | 48.8 | 11.3 | 90.3 |
| *Jasminium merijohonnes* | YL | 3.002 | 0.087 | 0.265 | 2.685 | 0.127 | 118.0 | 13.5 | 10.6 | 48.8 |
| *Lannea schweinfurthii* | ML | 2.647 | 0.157 | 0.398 | 0.996 | 0.017 | 58.4 | 19.0 | 8.0 | 55.8 |
| *Lannea schweinfurthii* | YL | 1.694 | 0.235 | 0.317 | 1.704 | 0.093 | 59.2 | 28.0 | 13.3 | 49.1 |
| *Lannea welwistchii* | Bark | 6.087 | 0.166 | 0.313 | 0.640 | 0.131 | 158.8 | 24.1 | 6.6 | 105.9 |
| *Lannea welwistchii* | ML | 2.526 | 0.175 | 0.579 | 0.998 | 0.073 | 48.9 | 24.0 | 11.5 | 74.9 |
| *Lannea welwistchii* | UFR | 0.648 | 0.447 | 0.370 | 1.140 | 0.024 | 76.0 | 43.6 | 10.4 | 19.5 |
| *Lannea welwistchii* | YL | 0.518 | 0.196 | 0.258 | 1.199 | 0.023 | 28.7 | 17.1 | 5.0 | 16.5 |
| *Lecaniodiscus fraxinifolius* | ML | 1.485 | 0.214 | 0.122 | 1.402 | 0.022 | 54.5 | 29.0 | 17.6 | 38.2 |
| *Lecaniodiscus fraxinifolius* | ML | 0.874 | 0.160 | 0.189 | 1.104 | 0.035 | 105.8 | 18.0 | 3.2 | 51.9 |
| *Lecaniodiscus fraxinifolius* | RFR | 0.043 | 0.189 | 0.075 | 0.908 | 0.012 | 30.4 | 14.9 | 16.3 | 7.9 |
| *Lecaniodiscus fraxinifolius* | UFR | 0.138 | 0.227 | 0.101 | 1.134 | 0.031 | 65.0 | 21.5 | 6.6 | 9.0 |
| *Lecaniodiscus fraxinifolius* | YL | 0.343 | 0.229 | 0.109 | 1.712 | 0.034 | 32.7 | 16.9 | 9.4 | 13.2 |
| *Lecaniodiscus fraxinifolius* | YL | 0.198 | 0.260 | 0.136 | 1.424 | 0.017 | 49.8 | 20.8 | 5.7 | 23.6 |
| *Lepisanthes senegalensis* | RFR | 0.221 | 0.136 | 0.122 | 1.088 | 0.018 | 53.3 | 14.8 | 5.5 | 10.6 |
| *Ludia mauritiana* | UFR | 0.171 | 0.204 | 0.150 | 1.168 | 0.119 | 38.1 | 28.6 | 5.4 | 16.5 |
| *Maerua triphylla* | ML | 2.056 | 0.101 | 1.309 | 4.259 | 0.114 | 111.9 | 11.3 | 1.3 | 46.2 |
| *Maerua triphylla* | YL | 0.858 | 0.306 | 0.368 | 1.752 | 0.041 | 53.6 | 30.1 | 6.1 | 23.4 |
| *Mangifera indica* | ML | 2.993 | 0.075 | 0.282 | 0.676 | 0.193 | 233.8 | 16.3 | 4.2 | 54.1 |
| *Mangifera indica* | YL | 0.541 | 0.248 | 0.220 | 1.433 | 0.014 | 36.6 | 20.6 | 8.9 | 19.8 |
| *Markhamia zanzibarica* | FL | 0.483 | 0.310 | 0.222 | 2.231 | 0.032 | 52.2 | 43.9 | 10.0 | 26.7 |
| *Markhamia zanzibarica* | ML | 0.697 | 0.242 | 0.272 | 2.596 | 0.026 | 52.7 | 30.2 | 11.8 | 33.6 |
| *Markhamia zanzibarica* | YL | 0.265 | 0.380 | 0.223 | 2.686 | 0.019 | 68.6 | 46.4 | 18.5 | 33.1 |
| *Milletia usaramensis* | FL | 0.302 | 0.346 | 0.209 | 2.226 | 0.008 | 74.8 | 36.2 | 13.5 | 23.4 |
| *Milletia usaramensis* | ML | 1.347 | 0.168 | 0.537 | 2.372 | 0.059 | 66.5 | 17.0 | 9.9 | 40.5 |
| *Milletia usaramensis* | YL | 0.277 | 0.464 | 0.280 | 3.071 | 0.013 | 96.5 | 43.7 | 12.6 | 35.4 |
| *Mondora grandidieri* | FL | 0.323 | 0.309 | 0.238 | 2.266 | 0.018 | 70.5 | 31.3 | 37.6 | 27.1 |
| *Oncoba spinosa* | ML | 1.988 | 0.141 | 0.362 | 1.913 | 0.046 | 43.8 | 22.8 | 5.9 | 25.9 |
| *Oncoba spinosa* | YL | 1.934 | 0.211 | 0.325 | 2.143 | 0.016 | 130.1 | 33.5 | 15.8 | 43.3 |
| *Pithecellobium dulce* | FL | 0.301 | 0.300 | 0.201 | 1.927 | 0.047 | 109.3 | 44.4 | 7.6 | 17.4 |
| *Pithecellobium dulce* | ML | 0.246 | 0.534 | 0.230 | 2.691 | 0.018 | 93.0 | 61.3 | 15.5 | 32.9 |
| *Pithecellobium dulce* | ML | 3.743 | 0.207 | 0.373 | 0.802 | 0.067 | 66.6 | 16.6 | 1.6 | 51.8 |
| *Pithecellobium dulce* | YL | 1.403 | 0.226 | 0.258 | 1.443 | 0.046 | 73.3 | 27.1 | 8.7 | 60.3 |
| *Pithecellobium dulce* | YL | 0.285 | 0.502 | 0.252 | 2.599 | 0.031 | 83.1 | 51.3 | 12.9 | 28.5 |
| *Plumeria obtusa* | FL | 0.766 | 0.151 | 0.137 | 2.070 | 0.059 | 151.0 | 15.0 | 5.7 | 11.1 |
| *Plumeria obtusa* | ML | 1.315 | 0.229 | 0.517 | 3.684 | 0.186 | 78.2 | 16.9 | 1.8 | 26.0 |
| *Plumeria obtusa* | YL | 1.300 | 0.214 | 0.536 | 2.957 | 0.078 | 133.5 | 23.9 | 3.3 | 31.5 |
| *Premna hildebrandtii* | FL | 0.650 | 0.275 | 0.230 | 2.163 | 0.022 | 53.9 | 25.5 | 9.9 | 32.8 |
| *Premna hildebrandtii* | ML | 1.829 | 0.289 | 0.355 | 3.016 | 0.131 | 65.6 | 37.2 | 34.6 | 65.6 |
| *Premna hildebrandtii* | UFR | 0.624 | 0.269 | 0.292 | 2.794 | 0.032 | 57.3 | 26.8 | 8.5 | 42.9 |
| *Premna hildebrandtii* | YL | 1.188 | 0.295 | 0.285 | 3.073 | 0.070 | 81.6 | 29.8 | 19.9 | 44.8 |
| *Pycnacoma littoralis* | ML | 3.173 | 0.214 | 0.371 | 2.003 | 0.332 | 46.9 | 31.5 | 24.2 | 77.3 |
| *Rauvolfia mombasiana* | ML | 1.692 | 0.175 | 0.639 | 2.348 | 0.127 | 230.9 | 17.0 | 3.2 | 35.3 |
| *Rauvolfia mombasiana* | YL | 0.825 | 0.270 | 0.387 | 5.003 | 0.124 | 51.5 | 19.6 | 12.1 | 30.1 |
| *Sideroxylon inermes* | ML | 0.686 | 0.127 | 0.487 | 1.294 | 1.430 | 49.4 | 10.8 | 0.5 | 15.5 |
| *Sideroxylon inermes* | RFR | 0.652 | 0.144 | 0.296 | 1.707 | 2.063 | 118.3 | 14.2 | 2.3 | 12.5 |
| *Sideroxylon inermes* | UFR | 0.277 | 0.164 | 0.232 | 1.404 | 0.745 | 54.4 | 21.0 | 8.5 | 12.7 |
| *Sideroxylon inermes* | YL | 0.491 | 0.179 | 0.443 | 1.752 | 2.976 | 41.8 | 13.2 | 3.9 | 10.7 |
| *Sterculia africana* | ML | 1.424 | 0.151 | 0.483 | 2.176 | 0.060 | 94.0 | 36.8 | 1.9 | 42.6 |
| *Sterculia africana* | YL | 1.449 | 0.180 | 0.490 | 2.399 | 0.066 | 248.8 | 37.5 | 7.8 | 39.6 |
| *Terminalia catappa* | ML | 2.555 | 0.196 | 0.320 | 1.698 | 0.142 | 46.5 | 26.4 | 14.1 | 73.4 |
| *Termite mound* | - | 2.396 | 0.174 | 0.266 | 0.302 | 0.016 | 5645.7 | 20.5 | 0.8 | 812.7 |
| *Tinospora caffra* | ML | 4.204 | 0.135 | 0.542 | 1.845 | 0.231 | 158.0 | 14.2 | 2.3 | 42.2 |
| *Tinospora caffra* | YL | 2.841 | 0.159 | 0.523 | 2.786 | 0.191 | 151.2 | 18.9 | 2.3 | 44.3 |
| *Trema orientalis* | ML | 1.869 | 0.112 | 0.299 | 1.256 | 0.126 | 177.9 | 16.4 | 0.6 | 76.4 |
| *Trema orientalis* | UFR | 2.110 | 0.322 | 0.483 | 1.468 | 0.021 | 179.4 | 40.7 | 1.9 | 180.9 |
| *Trema orientalis* | YL | 1.263 | 0.243 | 0.253 | 1.197 | 0.008 | 91.9 | 27.4 | 1.0 | 76.6 |
| *Trichilia emetica* | YL | 0.721 | 0.205 | 0.325 | 1.644 | 0.060 | 128.8 | 28.8 | 83.3 | 36.8 |
| *Trichilia emetica* | ML | 1.468 | 0.229 | 0.504 | 2.118 | 0.048 | 59.9 | 39.4 | 28.4 | 43.2 |
| *Uvaria acuminata* | ML | 1.806 | 0.186 | 0.212 | 1.525 | 0.029 | 48.0 | 22.9 | 20.2 | 40.1 |
| *Wall plaster* | - | 19.218 | 0.016 | 0.455 | 0.064 | 0.180 | 789.5 | 8.7 | 0.2 | 45.6 |
| *Zanthoxylum chalybeum* | ML | 2.051 | 0.373 | 0.474 | 2.799 | 0.133 | 48.8 | 28.5 | 13.2 | 54.1 |
| *Zanthoxylum chalybeum* | ML | 3.156 | 0.412 | 0.411 | 0.370 | 0.582 | 111.5 | 11.8 | 4.2 | 81.4 |
| *Zanthoxylum chalybeum* | YL | 0.432 | 0.583 | 0.334 | 2.826 | 0.011 | 70.6 | 75.2 | 17.4 | 39.3 |
| *Ziziphus mucronata* | ML | 2.917 | 0.097 | 0.372 | 1.842 | 0.023 | 51.3 | 9.8 | 2.3 | 46.0 |
| *Ziziphus mucronata* | YL | 1.616 | 0.115 | 0.326 | 2.249 | 0.059 | 205.2 | 18.8 | 5.7 | 33.5 |

FL = flower; ML = mature leaf; YL = young leaf; UFR = unripe fruit; RFR = ripe fruit
